# Supplementary material for: 24-nt reproductive phasiRNAs are broadly present in angiosperms
Source: PubMed Central journal article supplement (PMC6367383; doi:10.1038/s41467-019-08543-0), 2019-02-07
Supplement: 41467_2019_8543_MOESM3_ESM.pdf [file 41467_2019_8543_MOESM3_ESM.pdf]

## **Description of Additional Supplementary Files**

File Name: Supplementary Data 1

Description: 24-PHAS loci in litchi

File Name: Supplementary Data 2

Description: 24-PHAS loci in orange

File Name: Supplementary Data 3

Description: 24-PHAS loci in grape

File Name: Supplementary Data 4

Description: 24-PHAS loci in strawberry

File Name: Supplementary Data 5

Description: 24-PHAS loci in cotton

File Name: Supplementary Data 6

Description: MIR2275 identified in eudicots

File Name: Supplementary Data 7

Description: The expanded and complete phylogenetic tree showing more detail than the concise version shown in Figure 3D

File Name: Supplementary Data 8

Description: 24-PHAS loci in tomato

File Name: Supplementary Data 9

Description: 24-PHAS loci in *Petunia axillaris*

File Name: Supplementary Data 10

Description: 24-PHAS loci in *Petunia inflata*

File Name: Supplementary Data 11

Description: Probes used for in situ hybridizations

File Name: Supplementary Data 12

Description: Public sRNA sequence data used in this study
